# Supplementary material
Source: Springer Nature journal article supplement (https://www.springermedizin.de/resource/supplementary/12889_2011_4851_MOESM1_ESM.pdf/9492022)
Supplement: MOESM1 [file 9492022]

100%

80%

60%

40%

20%

0%

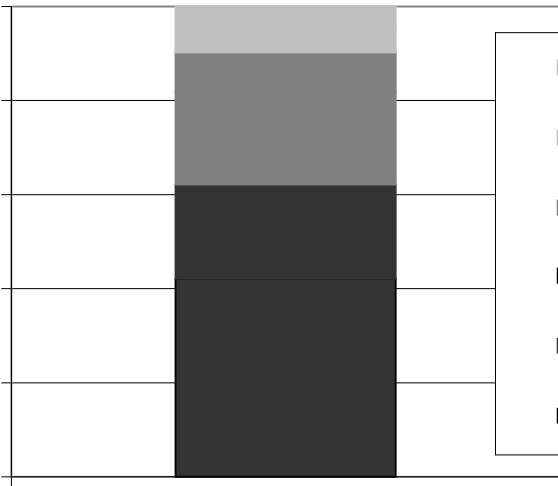

□ Non-ethnic normal-weight ♀

■ Non-ethnic normal-weight ♂

■ Ethnic normal-weight ♂

■ Ethnic normal-Weight ♀

■ Obese ♂

■ Obese ♀
